# Supplementary material for: On-treatment biopsies to predict response to neoadjuvant chemotherapy for breast cancer
Source: PubMed Central journal article supplement (PMC11423510; doi:10.1186/s13058-024-01883-w), 2024-09-24

$\Delta_{\text{Ki-67}}$  vs.  $\Delta_{\text{TILs}}$ 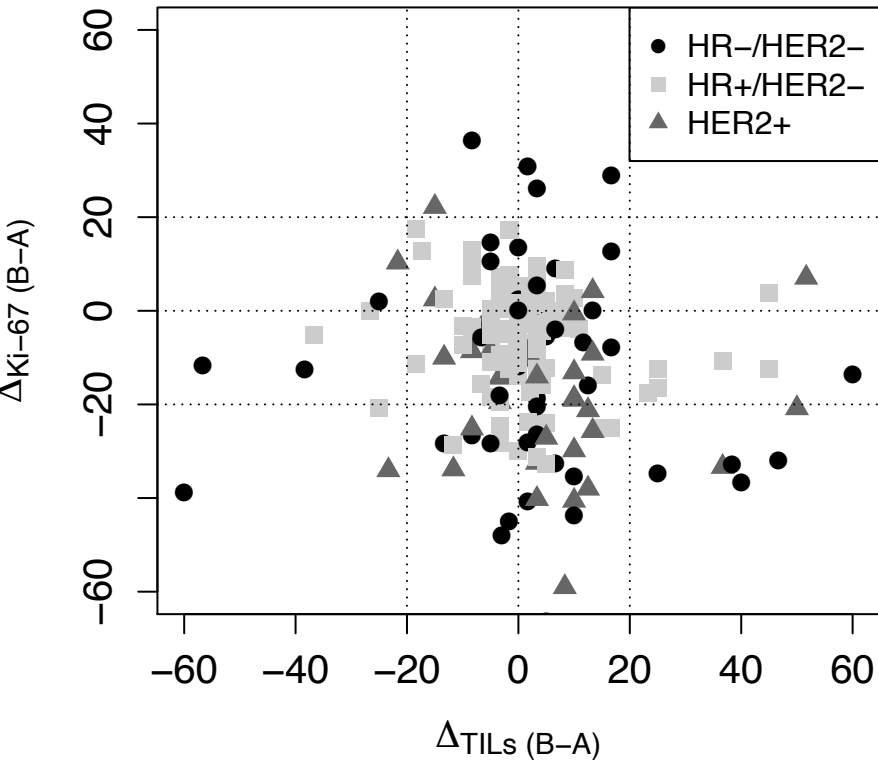

Supplement: 13058_2024_1883_MOESM3_ESM.pdf [file 13058_2024_1883_MOESM3_ESM.pdf]
